# Supplementary material for: Titanocene and zirconocene complexes of a phosphorus analog of an Arduengo's carbene: Application in the synthesis of 1,3-diphosphafulvenes
Source: Royal Society of Chemistry journal article supplement (doi:10.1039/b403436h), 2004-01-01
Supplement: b403436h.doc [file b403436h.doc]

**Supporting Information**

for the manuscript

Titanocene and zirconocene complexes of a phosphorus analog of an Arduengo’s carbene: Application in the synthesis of 1,3-diphosphafulvenes.

by

Thibault Cantat, Nicolas Mézailles, Nicole Maigrot, Louis Ricard and Pascal Le Floch**a*

a Laboratoire “Hétéroéléments et Coordination”, UMR CNRS 7653, Departement de Chimie, Ecole Polytechnique, 91128 Palaiseau cedex, France. Fax: (33).01.69.33.39.90; Tel: (33).01.69.33.45.70; E-mail: lefloch@poly.polytechnique.fr.

**Content**

1°) General considerations.

2°) Syntheses and characterizations of carbene complexes **2a** and **2b**.

3°) Syntheses and characterizations of carbene complexes **4a,b** and **5a,b**.

4°) General procedure and characterizations of 1,3-diphosphafulvenes **6, 7 8, 9, 10**.

5°) X-ray crystal structure of 1,3-diphosphafulvene **6a**.

6°) X-ray crystal structure of 1,3-diphosphafulvene **8b**.

7°) X-ray crystal structure of 1,3-diphosphafulvene **9a**.

8°) Theoretical data for complex *meso* and *rac*-[ZrCp2(C3H4P2)].

**1°) General considerations.**

All reactions were routinely performed under an inert atmosphere of argon or nitrogen by using Schlenk and glove-box techniques and dry deoxygenated solvents. Dry THF, ether and hexanes were obtained by distillation from Na/benzophenone. Dry dichloromethane was distilled on P2O5. Nuclear magnetic resonance spectra were recorded on a Bruker AC-200 SY spectrometer operating at 300.0 MHz for 1H, 75.5 MHz for 13C and 121.5 MHz for 31P. Solvent peaks are used as internal reference relative to Me4Si for 1H and 13C chemical shifts (ppm); 31P chemical shifts are relative to a 85% H3PO4 external reference. Coupling constants are given in Hertz. The following abbreviations are used: s, singlet; d, doublet; t, triplet; m, multiplet. Elemental analyzes were performed by the “Service d’analyses du CNRS” at Gif sur Yvette.

**2°) Syntheses and characterizations of carbene complexes 2a and 2b.**

Diphospholene **1** 200 mg, (0.8 mmol) was added to a solution of the [TiCp2(P(OMe)3)2] complex (0.08 mmol) prepared according to ref. 9 in THF (10 mL). The resulting mixture turned purple instantaneously and a 31P NMR spectrum showed the completion of the reaction.

**2a**: 31P NMR (121.5 MHz, THF, 25°C, 85% H3PO4 as external standard):  174.4 (t, 3*J*PP=22.2 Hz; P(OMe)3), 78.5 (d, 3*J*PP=22.2 Hz; PCP).

**2b**: 31P NMR (121.5 MHz, THF, 25°C, 85% H3PO4 as external standard):  173.7 (dd, 3*J*PP=7.6 Hz, 3*J*PP=21.6 Hz; P(OMe)3), 117.8 (dd, 2*J*PP=36.0 Hz, 3*J*PP=7.6 Hz; PCP), 109.1 (dd, 2*J*PP=36.0 Hz, 3*J*PP=21.6 Hz; PCP).

**3°) Syntheses and characterizations of carbene complexes 4a,b and 5a,b.**

BuLi (2.1 mL, 1.5 M in hexanes, 3.2 mmol) was added to a a solution of Cp2ZrCl2 (460 mg, 1.6 mmol) in THF (30 mL) at -78°C. The mixture was stirred at –78°C for one hour and warmed to 0°C. This mixture was then transferred by cannula to a Schlenk flask containing **1** (340 mg, 0.8 mmol). The resulting burgundy red mixture was warmed to room temperature then stirred for 3 hours. Complexes **4a,b** are highly water sensitive and decompose when taken to dryness. NMR data were recorded on the crude mixture by evaporating the most part of the solution (2 mL remaining) and by adding d6-benzene (1 mL) as internal reference.

Selected data: **4a** (meso): 31P NMR (121.5 MHz, C6D6, 25°C, 85% H3PO4 as external standard): 87.1 (s); 13C NMR (75.5 MHz, C6D6, 25°C):  142.4 (t, 1*J*CP=12.7 Hz; PCP).

Complexes **5a,b** were obtained by adding PMe3 (165 µL, 1.6 mmol, 2 equiv.) to the crude mixture prepared as above. Formation of complexes **5a,b** is instantaneous as shown by 31P NMR spectroscopy. The mixture was taken to dryness for a short period of time and d6-benzene was added to record NMR spectra.

Selected data: **5a**: 31P NMR (121.5 MHz, C6D6, 25°C, 85% H3PO4 as external standard):  -9.92 (t, 3*J*PP=7.3 Hz, PMe3), 75.3 (d, 3*J*PP=7.3 Hz, PCP); 13C NMR (75.5 MHz, C6D6, 25°C):  220.2 ppm (dt, 1*J*CP=87.3 Hz, 2*J*CP=11.5 Hz; PCP). **5b**: 31P NMR (121.5 MHz, C6D6, 25°C, 85% H3PO4 as external standard):  -11.21 (t, 3*J*PP=6.1 Hz, PMe3), 114.4 (broad, PCP), 119.3 (broad, PCP); 13C NMR (75.5 MHz, C6D6, 25°C):  212.3 (m; PCP).

**4°) General procedure and characterizations of 1,3-diphosphafulvenes 6, 7 8, 9, 10.**

Crude **4** was prepared as above and ketone or aldehyde (1.6 mmol, 2 equiv.) was added. An immediate discoloration of the mixture was observed and 31P NMR spectroscopy showed the complete formation of the corresponding fulvene derivatives **a** (meso) and **b** (rac). After evaporation of the solvent, the compounds were purified by column chromatography using toluene/hexane (3:7) as mixture and recovered as a solid for **6a/6b** (70%), **7a/7b** (70%), **8a/8b** (95%), **9a/9b** (80%), **10a/10b** (60%).

Selected data: **6a**: 1H NMR (300 MHz, CD2Cl2, 25°C):  1.25-2.0 (12H, CH, CH2), 3.0 (s, 2H, CH), 7.0-7.4 (m, 20H, H of phenyl); 31P NMR (121.5 MHz, CD2Cl2, 25°C, 85% H3PO4 as external standard):  20.71 (s); 13C NMR (75.5 MHz, CD2Cl2, 25°C):  28.0 (s, CH), 28.3 (s, CH), 37.0 (s, CH2), 38.7 (s, CH2), 39.0 (s; CH2), 41.7 (pseudo-t, 3*J*CP=12.9 Hz, CH), 127.1-137.9 (phenyl), 139.1 (t, 2*J*CP=12.0 Hz, C), 148.2 (s), 169.1 (t, 1*J*CP=21.9 Hz , PCP); MS (70 eV): m/z (%): 540 [M+] (100). **6b**: 31P NMR (121.5 MHz, CD2Cl2, 25°C, 85% H3PO4 as external standard):  46.29 (s). Anal. Calcd for C37H30P2: C 82.82, H 5.64; Found: C 82.55, H 5.85.

**7a**: 1H NMR (300 MHz, CDCl3, 25°C):  1.61 (m, 4H), 2.28 (m, 2H), 6.87-7.57 (m, 20H; H of phenyl); 31P NMR (121.5 MHz, CDCl3, 25°C, 85% H3PO4 as external standard):  24.3 (s); 13C NMR (75.5 MHz, CDCl3, 25°C): 26.5 (s), 36.3 (t, 3*J*CP=9.1 Hz), 125.3-129.8 (phenyl), 133.6 (t, 2*J*CP=9.4 Hz), 148.2 (s), 165.1 (t, 1*J*CP=23.0 Hz). **7b**: 1H NMR (300 MHz, CDCl3, 25°C): 1.49 (m, 4H; CH2), 2.06 (m, 4H; CH2), 6.87-7.57 (m, 20H; H of phenyl); 31P NMR (121.5 MHz, CDCl3, 25°C, 85% H3PO4 as external standard):  48.3 (s); 13C NMR (75.5 MHz, CDCl3, 25°C):  27.2 (s), 35.6 (t, 3*J*CP=8.8 Hz), 125.3-129.8 (phenyl), 133.6 (t, 2*J*CP=10.4 Hz), 147.4 (s), 163.2 (t, 1*J*CP=19.2 Hz). Anal. Calcd for C32H38P2: C 81.00, H 5.95; Found: C 81.34, H 5.77.

**8a**: 31P NMR (121.5 MHz, CDCl3, 25°C, 85% H3PO4 as external standard): 27.3 (s). **8b**: 1H NMR (300 MHz, CDCl3, 25°C):  6.93-7.34 (m, 20H, H of phenyl); 31P NMR (121.5 MHz, CDCl3, 25°C, 85% H3PO4 as external standard):  51.5 (s); 13C NMR (75.5 MHz, CDCl3, 25°C):  78.8 (t, 1*J*CP=28.0 Hz), 127.9-134.3 (phenyl), 132.9 (t, 2*J*CP=11.5 Hz), 145.3 (AXX’, Σ*J*CP=122.8 Hz). Anal. Calcd for C40H30P2: C 83.90, H 5.28; Found: C 83.50, H 5.35.

**9a**: 1H NMR (300 MHz, CDCl3, 25°C):  6.86-7.79 (m, 28H; H of phenyl); 31P NMR (121.5 MHz, CDCl3, 25°C, 85% H3PO4 as external standard):  33.7 (s, meso); 13C NMR (75.5 MHz, CDCl3, 25°C):  126.6 (t, 3*J*CP=5.9 Hz), 137.9 (t, 2*J*CP=12.5 Hz), 137.9 (t, 1*J*CP=16.2 Hz), 147.4 (s), 152.3 (s). **9b**:1H NMR (300 MHz, CDCl3, 25°C):  6.93-7.85 (m, 28H, H of phenyl); 31P NMR (121.5 MHz, CDCl3, 25°C, 85% H3PO4 as external standard):  59.9 (s); 13C NMR (75.5 MHz, CDCl3, 25°C):  126.2 (t, 3*J*CP=4.1 Hz), 137.5 (t, 2*J*CP=12.0 Hz), 142.1 (t, 1*J*CP=18.0 Hz), 145.8 (broad), 152.4 (s). Anal. Calcd for C40H28OP2: C 81.90, H 4.81; Found: C 81.70, H 4.77.

**10a**: 31P NMR (121.5 MHz, CDCl3, 25°C, 85% H3PO4 as external standard):  21.6 (d, 2*J*PP=40.8 Hz), 30.42 (d, 2*J*PP=40.8 Hz). **10b**: 31P NMR (121.5 MHz, CDCl3, 25°C, 85% H3PO4 as external standard): 4.6 (d, 2*J*PP=25.6 Hz), 52.6 (d, 2*J*PP=25.6 Hz); MS (70 eV): m/z (%): 596 [M+] (100). Anal. Calcd for C42H30P2: C 84.55, H 5.07; Found: C 84.65, H 5.15.

**5°) X-ray crystal structure of 1,3-diphosphafulvene 6a.**

Crystal data for compound **6a** (C38H36Cl2P2): space group Pī, a = 10.067(1), b = 12.325(1), c = 13.669(1) Å, α = 72.220(1),  = 77.590(1), γ = 80.800(1)°, V = 1569.1(2) Å3, Z = 2, rcalcd = 1.324 g.cm-3, *F*(000) = 656, MoKα radiation (λ = 0.71069 Å), μ = 0.336 cm-1. Data collection was performed on a Nonius KappaCCD single crystal diffractometer at *T* = 150K. The crystal structure was solved with SIR97,[1] refinement against F2 (SHELXL97[2]) with anisotropic thermal parameters for all non-hydrogen atoms, calculated hydrogen positions with riding isotropic thermal parameters. Crystal dimensions 0.20x0.20x0.16. hkl ranges : -13 14 ; -17 17 ; -19 17. 14286 data collected, 9134 unique data (Rint = 0.0152, KappaCCD diffractometer), 7563 data with I > 2(I), 380 refined parameters. GOF(F2) = 1.061 , final R indices (*R*1 = |*F*o|-|*F*c||/ |*F*o|, w*R*2 = [w(*F*o2-*F*c2)2/  w(*F*o2)2]1/2, *R*1 = 0.0385, w*R*2 = 0.1104, max/min residual electron density 0.388(0.049) / -0.522(0.049) eÅ3.

Crystallographic data for the structure reported in this paper have been deposited with the Cambridge Crystallographic Data Centre as supplementary publication no. CCDC-227151. Copies of the data can be obtained free of charge on application to CCDC, 12 Union Road, Cambridge CB21EZ, UK (fax (+44)1223-336-033; e-mail : [deposit@ccdc.cam.ac.uk](mailto:deposit@ccdc.cam.ac.uk)).

1) Altomare, M. C. Burla, M. Camalli, G. Cascarano, C. Giacovazzo, A. Guagliardi, A. G. G. Moliterni, G. Polidori, R. Spagna, SIR97, an integrated package of computer programs for the solution and refinement of crystal structures using single crystal data, 1999.

2) M. Sheldrick, SHELXL-97; Universität Göttingen, Göttingen, Germany, 1998.

**
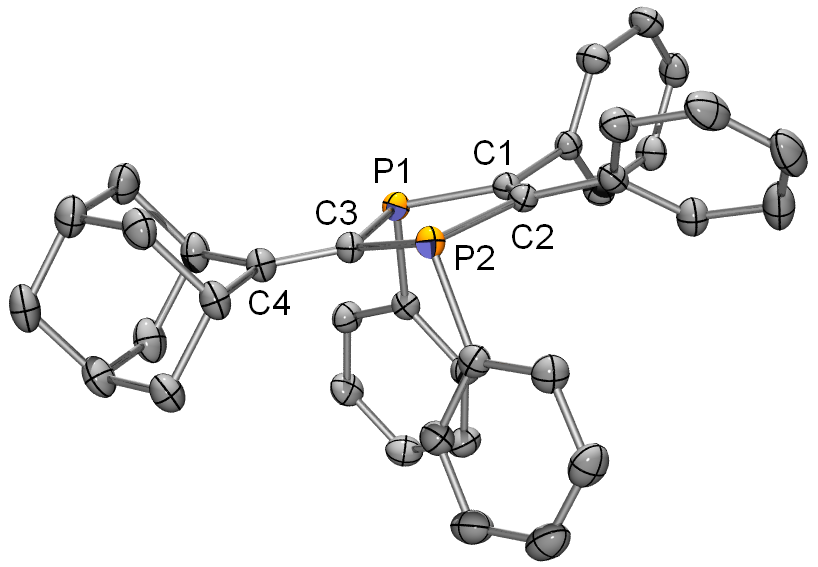
**

**7°) X-ray crystal structure of 1,3-diphosphafulvene 8b**.

Crystal data for compound **8b** (C40H30P2): space group *P*21/c, a = 11.7340(10), *b* = 6.3270(10), *c* = 40.956(2) Å, b = 91.3540(10)°, *V* = 3039.8(6) Å3, *Z* = 4, rcalcd = 1.251 g cm-3, *F*(000) = 1200, MoK radiation ( = 0.71073 Å),  = 0.171 cm-1; crystal dimensions 0.22x0.12x0.06 mm. Data collection was performed on a Nonius KappaCCD single crystal diffractometer at *T* = 150K. The crystal structure was solved with SIR97,[1] refinement against F2 (SHELXL97[2]) with anisotropic thermal parameters for all non-hydrogen atoms, calculated hydrogen positions with riding isotropic thermal parameters. hkl ranges : -12 13, -7 6, -45 45; 7293 data collected, 4288 unique data (Rint = 0.0363 ), 3070 data with I > 2(I), 379 parameters refined, GOF(F2) = 1.006 , final R indices (*R*1 = |*F*o|-|*F*c||/ |*F*o|, w*R*2 = [w(*F*o2-*F*c2)2/  w(*F*o2)2]1/2, *R*1 = 0.0552, w*R*2 = 0.1561, max/min residual electron density 0.633(0.049) / -0.240(0.049) eÅ3. Crystallographic data for the structure reported in this paper have been deposited with the Cambridge Crystallographic Data Centre as supplementary publication no. CCDC-227151. Copies of the data can be obtained free of charge on application to CCDC, 12 Union Road, Cambridge CB21EZ, UK (fax (+44)1223-336-033; e-mail : [deposit@ccdc.cam.ac.uk](mailto:deposit@ccdc.cam.ac.uk)).

1) Altomare, M. C. Burla, M. Camalli, G. Cascarano, C. Giacovazzo, A. Guagliardi, A. G. G. Moliterni, G. Polidori, R. Spagna, SIR97, an integrated package of computer programs for the solution and refinement of crystal structures using single crystal data, 1999.

2) M. Sheldrick, SHELXL-97; Universität Göttingen, Göttingen, Germany, 1998.


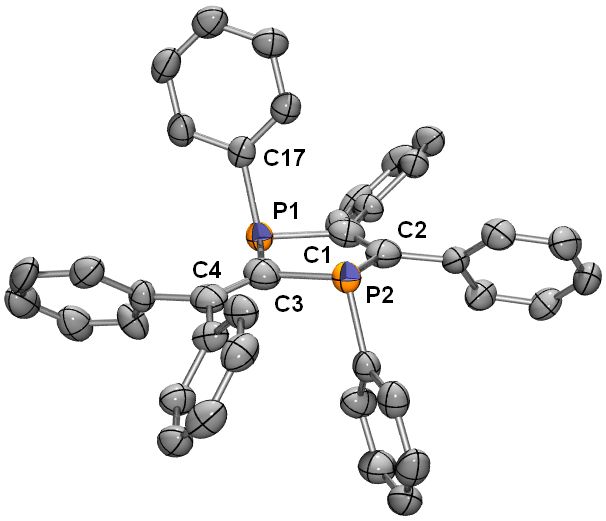


**7°) X-ray crystal structure of 1,3-diphosphafulvene 9a**.

Crystal data for compound **9a**: (C40H28OP2): space group Pī, a = 9.324(1), b = 17.429(1), c = 19.246(1) Å, α = 101.240(1), β = 96.960(1), γ = 98.770(1)°, *V* = 2994.8(4) Å3, Z = 4, rcalcd = 1.301 g.cm-3, *F*(000) = 1224, MoK radiation ( = 0.71073 Å), μ = 0.178 cm-1,crystal dimensions 0.22x0.12x0.06 mm, Data collection was performed on a Nonius KappaCCD single crystal diffractometer at *T* = 150K. The crystal structure was solved with SIR97,[1] refinement against F2 (SHELXL97[2]) with anisotropic thermal parameters for all non-hydrogen atoms, calculated hydrogen positions with riding isotropic thermal parameters. hkl ranges : -11 9 ; -20 20 ; -23 22, 16597 data collected, 10913 unique data (Rint = 0.0265 ), 7270 data with I > 2(I), 775 parameters refined, GOF(F2) = 0.997 , final R indices (*R*1 = |*F*o|-|*F*c||/ |*F*o|, w*R*2 = [w(*F*o2-*F*c2)2/  w(*F*o2)2]1/2, R1 = 0.0430, wR2 = 0.1065, max/min residual electron density 0.236(0.046) / -0.400(0.046) eÅ3. Crystallographic data for the structure reported in this paper have been deposited with the Cambridge Crystallographic Data Centre as supplementary publication no. CCDC-227151. Copies of the data can be obtained free of charge on application to CCDC, 12 Union Road, Cambridge CB21EZ, UK (fax (+44)1223-336-033 ; e-mail : [deposit@ccdc.cam.ac.uk](mailto:deposit@ccdc.cam.ac.uk)).

**
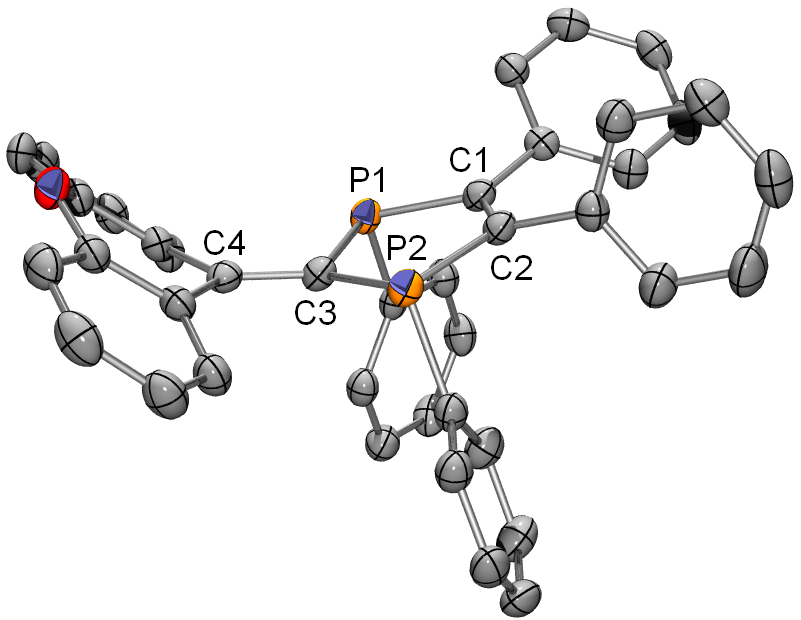
**

**8°) Theoretical data for complex *meso* and *rac*-[ZrCp2(C3H4P2)].**

All calculations were carried out using the Gaussian 03W package.1 Geometry optimizations were carried out using the Density Functional Theory (DFT) 2,3 by means of pure gradient-corrected exchange functional and the Lee-Yang-Parr non local correlation functional BLYP 4 as implemented in the Gaussian program. A quasirelativistic effective core potential operator was used to represent the electron core of zirconium atom. The basis set for the metal was that associated with the pseudopotential with a standard double-ζ LANL2DZ contraction. 5 All the other atoms (C, H and P) were represented by the 6-31G* basis set. Population analysis was carried out using the NBO program implemented in Gaussian.6

1) Frisch, M. J.; Trucks, G. W.; Schlegel, H. B.; Scuseria, G. E.; Robb, M. A.; Cheeseman, J. R.; Zakrzewski, V. G.; Montgomery, J. J. A.; Stratmann, R. E.; Burant, J. C.; Dapprich, S.; Millam, J. M.; Daniels, A. D.; Kudin, K. N.; Strain, M. C.; Farkas, O.; Tomasi, J.; Barone, V.; Cossi, M.; Cammi, R.; Mennucci, B.; Pomelli, C.; Adamo, C.; Clifford, S.; Ochterski, J.; Petersson, G. A.; Ayala, P. Y.; Cui, Q.; Morokuma, K.; Malick, D. K.; Rabuck, A. D.; Raghavachari, K.; Foresman, J. B.; Cioslowski, J.; Ortiz, J. V.; Baboul, A. G.; Stefanov, B. B.; Liu, G.; Liashenko, A.; Piskorz, P.; Komaromi, I.; Gomperts, R.; Martin, R. L.; Fox, D. J.; Keith, T.; Al-Laham, M. A.; Peng, C. Y.; Nanayakkara, A.; Challacombe, M.; Gill, P. M. W.; Johnson, B.; Chen, W.; Wong, M. W.; Andres, J. L.; Gonzalez, C.; Head-Gordon, M.; Replogle, E. S.; Pople, J. A. In; Revision A-11 ed.; Gaussian, Inc.: Pittsburgh PA, 1998.

2) Parr, R. G.; Yang, W. *Density Functional Theory of Atoms and Molecules*; Oxford University Press: Oxford, U. K., 1989.

3) Ziegler, T. *Chemical Review* 1991, **91**, 651-667.

4) (a) Becke, A. D. *Phys. Rev. A* 1988, **38**, 3098-3108. (b) Perdew, J. P. *Phys. Rev. B .* 1986, **33**, 8822-8832.

5) Hay, P. J.; Wadt, W. R. *J. Chem. Phys.* 1985, **82**, 299-310.

6) A.E.Reed, L. A. Curtiss, F. Weinhold, *Chem. Rev.* **1988**, *88*, 899-926.

**MESO COMPLEX**


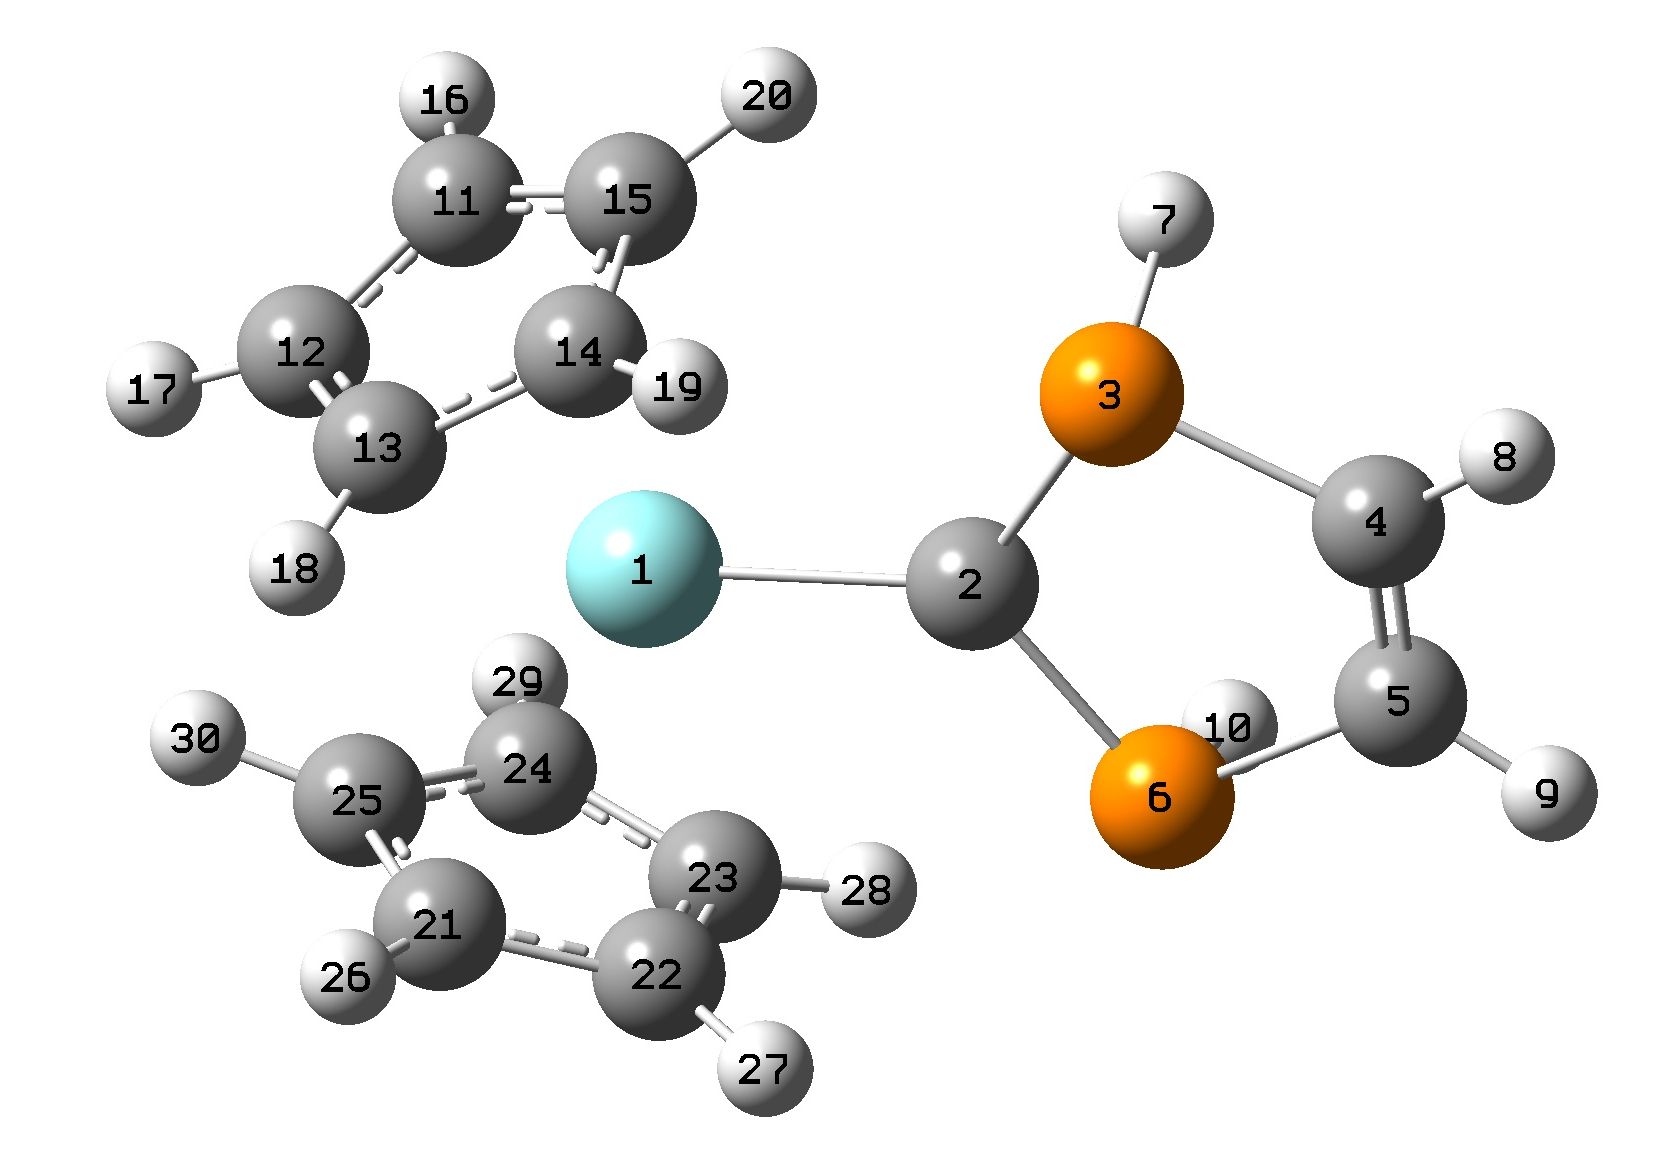


Input orientation:

---------------------------------------------------------------------

Center Atomic Atomic Coordinates (Angstroms)

Number Number Type X Y Z

---------------------------------------------------------------------

1 40 0 -0.007887 -0.124148 -0.779211

2 6 0 0.003826 -0.136190 1.329801

3 15 0 1.515328 -0.133311 2.394266

4 6 0 0.690865 -0.075301 4.034257

5 6 0 -0.647901 -0.038270 4.041899

6 15 0 -1.492964 -0.050100 2.411438

7 1 0 1.869900 -1.527855 2.440021

8 1 0 1.287501 -0.013547 4.944762

9 1 0 -1.229786 0.056083 4.959131

10 1 0 -1.923537 -1.422926 2.461672

11 6 0 2.081864 -1.038694 -1.970883

12 6 0 1.663402 0.069370 -2.747755

13 6 0 1.805645 1.239694 -1.952762

14 6 0 2.347367 0.859281 -0.693045

15 6 0 2.514633 -0.552505 -0.702074

16 1 0 2.102962 -2.072687 -2.297646

17 1 0 1.282623 0.028671 -3.760215

18 1 0 1.576265 2.251099 -2.266443

19 1 0 2.591768 1.514070 0.131655

20 1 0 2.939479 -1.146790 0.094956

21 6 0 -1.756484 1.338360 -1.932342

22 6 0 -2.304013 0.988002 -0.666433

23 6 0 -2.549185 -0.412371 -0.673202

24 6 0 -2.158461 -0.921261 -1.946746

25 6 0 -1.688254 0.162267 -2.728617

26 1 0 -1.475116 2.335652 -2.248867

27 1 0 -2.502409 1.654988 0.160838

28 1 0 -2.997128 -0.982557 0.128771

29 1 0 -2.240433 -1.952378 -2.272994

30 1 0 -1.321877 0.100962 -3.745344

---------------------------------------------------------------------

**RAC COMPLEX**


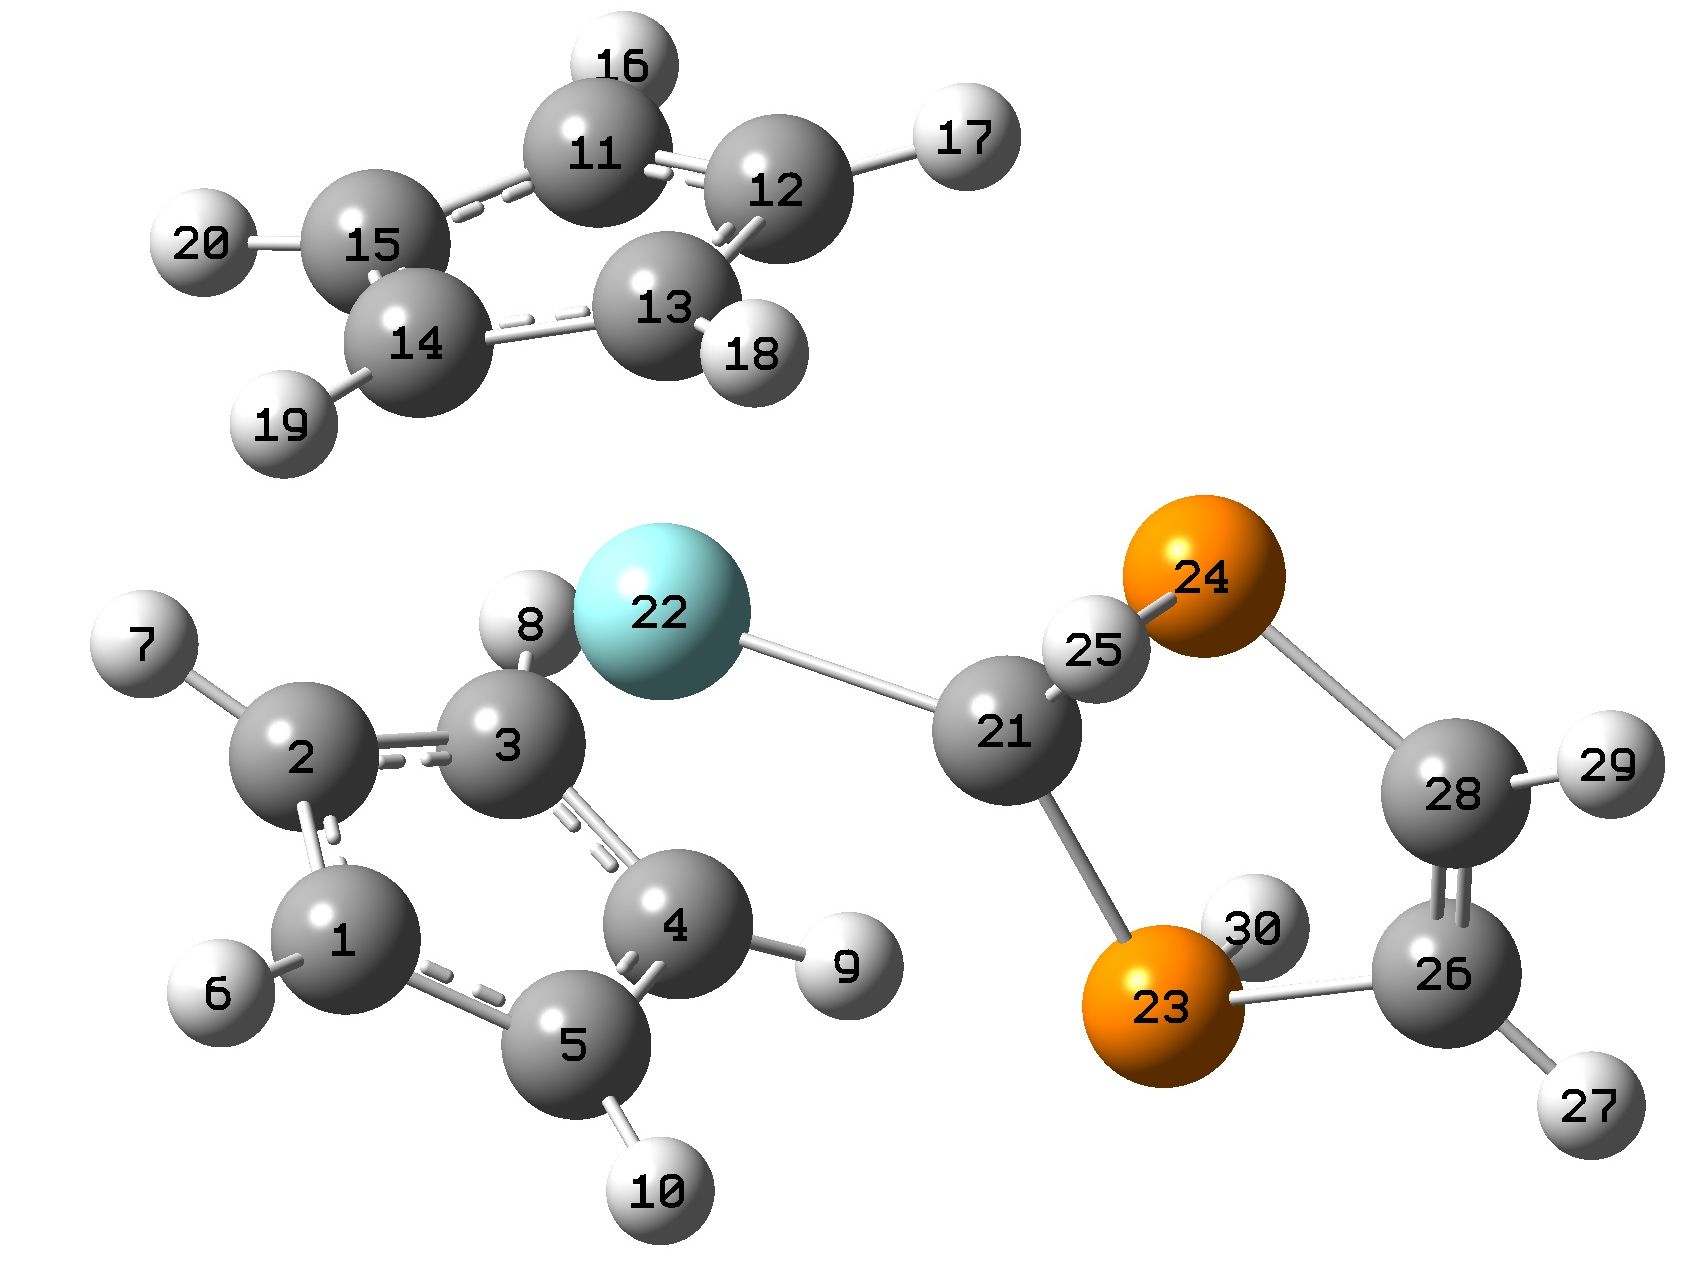


Input orientation:

---------------------------------------------------------------------

Center Atomic Atomic Coordinates (Angstroms)

Number Number Type X Y Z

---------------------------------------------------------------------

1 6 0 0.012303 -0.008785 0.001502

2 6 0 0.019520 -0.007464 1.421029

3 6 0 1.371180 -0.001937 1.851883

4 6 0 2.203777 0.036037 0.695698

5 6 0 1.361989 0.027404 -0.450589

6 1 0 -0.870050 -0.008983 -0.628604

7 1 0 -0.852464 -0.027966 2.062145

8 1 0 1.709344 0.014573 2.881793

9 1 0 3.283141 0.097672 0.691469

10 1 0 1.699666 0.052584 -1.477522

11 6 0 0.383739 -3.723111 2.651428

12 6 0 0.916903 -4.598836 1.663436

13 6 0 0.031287 -4.588561 0.550671

14 6 0 -1.042388 -3.701093 0.852492

15 6 0 -0.833738 -3.185513 2.157580

16 1 0 0.817513 -3.522435 3.624641

17 1 0 1.826122 -5.179531 1.736644

18 1 0 0.134842 -5.177860 -0.349805

19 1 0 -1.893162 -3.489614 0.214676

20 1 0 -1.479010 -2.488618 2.676973

21 6 0 2.648997 -2.958838 -0.548610

22 40 0 1.068611 -2.254463 0.659821

23 15 0 3.929778 -1.906882 -1.373709

24 15 0 2.986013 -4.732064 -0.960835

25 1 0 2.020939 -4.976377 -1.993555

26 6 0 4.924002 -3.242925 -2.149204

27 1 0 5.818108 -2.997955 -2.722565

28 6 0 4.440032 -4.487310 -2.056677

29 1 0 4.917943 -5.343873 -2.532155

30 1 0 4.820170 -1.628784 -0.284036

---------------------------------------------------------------------
